# Supplementary material for: High-yield preparation of vertically aligned gold nanorod arrays via a controlled evaporation-induced self-assembly method
Source: Royal Society of Chemistry journal article supplement (doi:10.1039/c4tc00325j), 2014-01-01

High-yield Preparation of Vertically Aligned Gold Nanorod Arrays via Controlled Evaporation-induced Self-assembly Method

Zhong Zhang, and Mengshi Lin\*

Food Science Program, Division of Food Systems & Bioengineering, University of Missouri, Columbia, MO, USA 65211-5160

**Correspondence:** M. Lin, Food Science Program, Division of Food System & Bioengineering, University of Missouri, Columbia, MO, USA. 65211; Tel: (573) 884-6718; fax (573) 884-7964.  
(E-mail: [linme@missouri.edu](mailto:linme@missouri.edu))

*Supporting information*

Table of content

**Fig. S1** The sketch of the experimental setup in the present study.

**Fig. S2** Characterization of gold nanorod arrays: (a), (b), and (c) optical images of gold nanorod islands at different areas; (d), (e), and (f) SEM images of gold nanorod islands with different magnifications.

**Fig. S3** optical images of gold nanorod islands near center of the droplet

**Fig. S1** The sketch of the experimental setup in the present study.

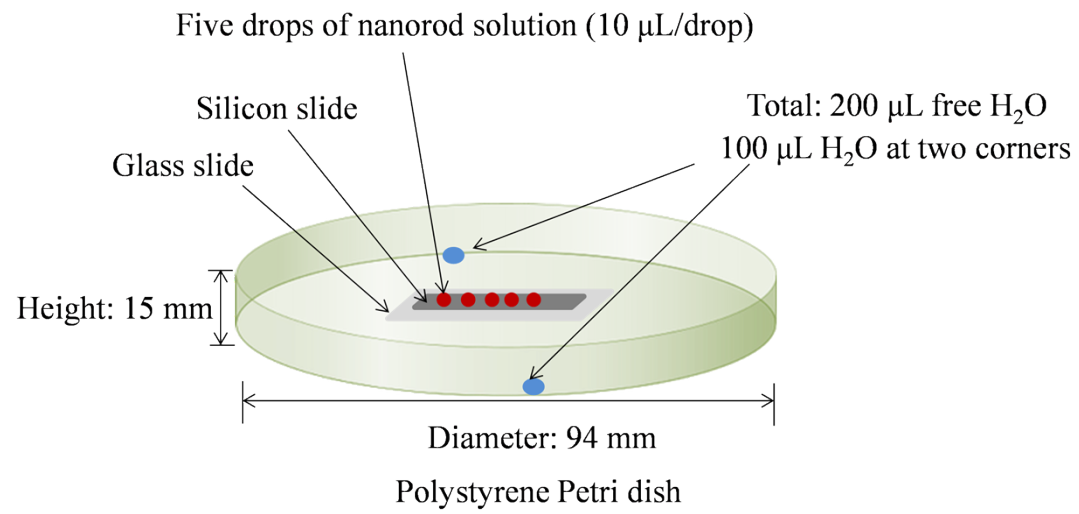

**Fig. S2** Characterization of gold nanorod arrays: (a), (b), and (c) optical images of gold nanorod islands at different areas; (d), (e), and (f) SEM images of gold nanorod islands with different magnifications.

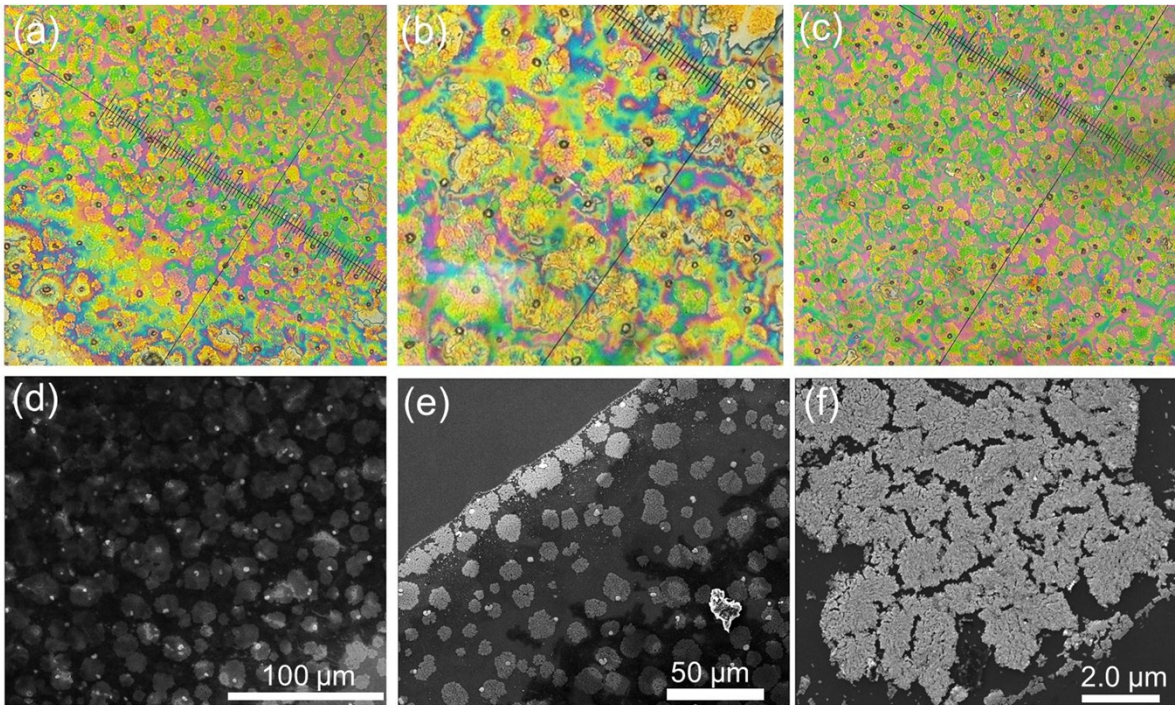

**Fig. S3** Optical images of gold nanorod islands near center of the droplet

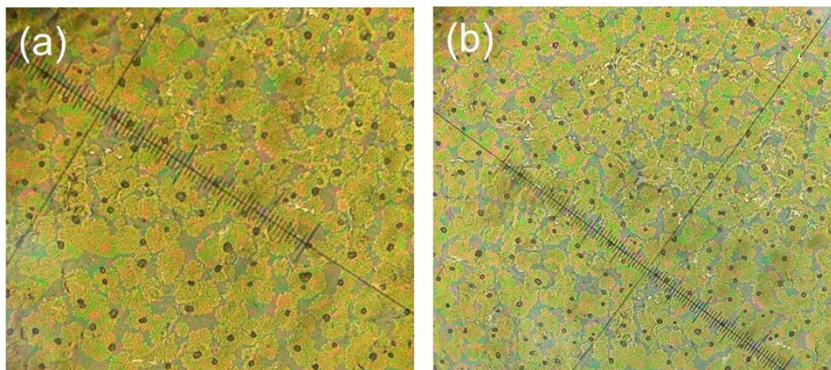



**Fig. S4** Characterization of vertically aligned gold nanorods (aspect ratio of 3.4) assembled on the silicon surface: (a), (b), and (c) were assembled by the proposed two step method (first step: 24 h, second step: 36-48 h); (d), (e), and (f) were assembled by extending the incubation time to ~144 h in one step.

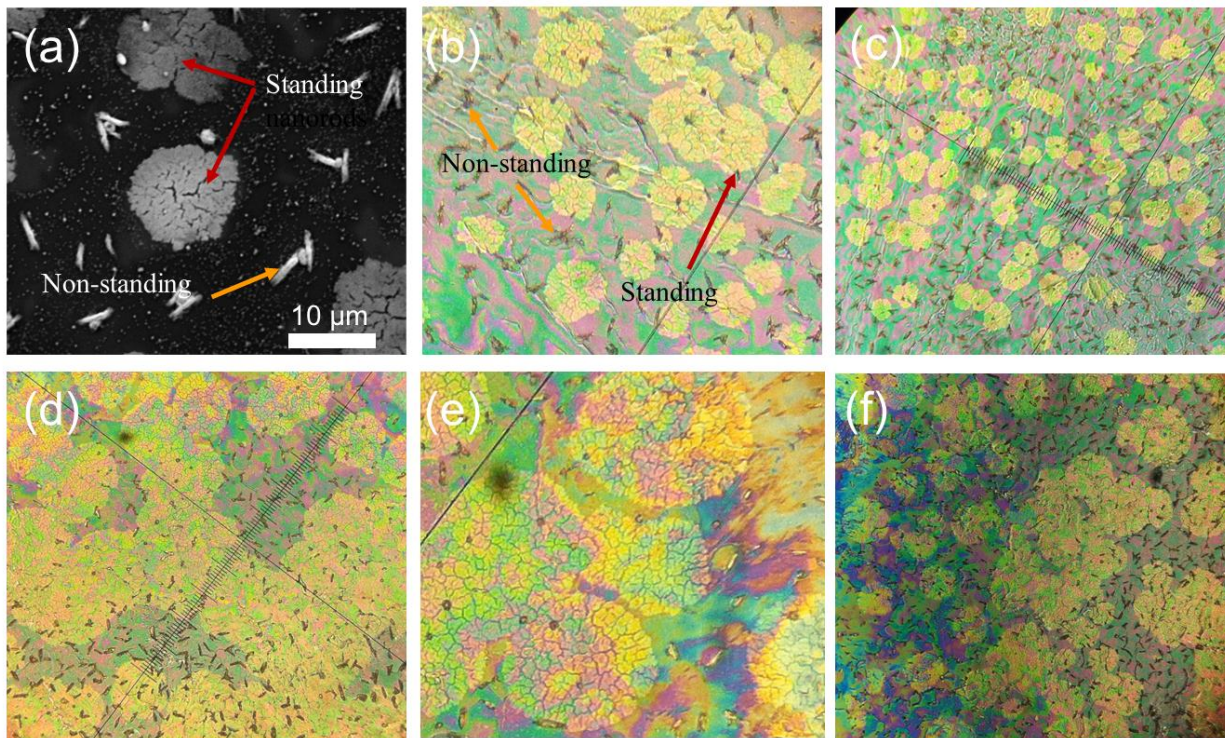

Supplement: c4tc00325j1.pdf [file c4tc00325j1.pdf]
